# Supplementary material for: Transcriptional profiling of innate and adaptive human immune responses to mycobacteria in the tuberculin skin test
Source: PubMed Central journal article supplement (PMC3258543; doi:10.1002/eji.201141841), 2011-07-29
Supplement: eji0041-3253-SD1.pdf [file eji0041-3253-SD1.pdf]

# European Journal of Immunology

**Supporting Information**

**for**

**DOI 10.1002/eji.201141841**

**Transcriptional profiling of innate and adaptive human immune responses to mycobacteria in the tuberculin skin test**

Gillian S. Tomlinson, Tamaryn J. Cashmore, Paul T. G. Elkington, John Yates, Rannakoe J. Lehloenya, Jhen Tsang, Michael Brown, Robert F. Miller, Keertan Dheda, David R. Katz, Benjamin M. Chain and Mahdad Noursadeghi

Supplementary Figure 1

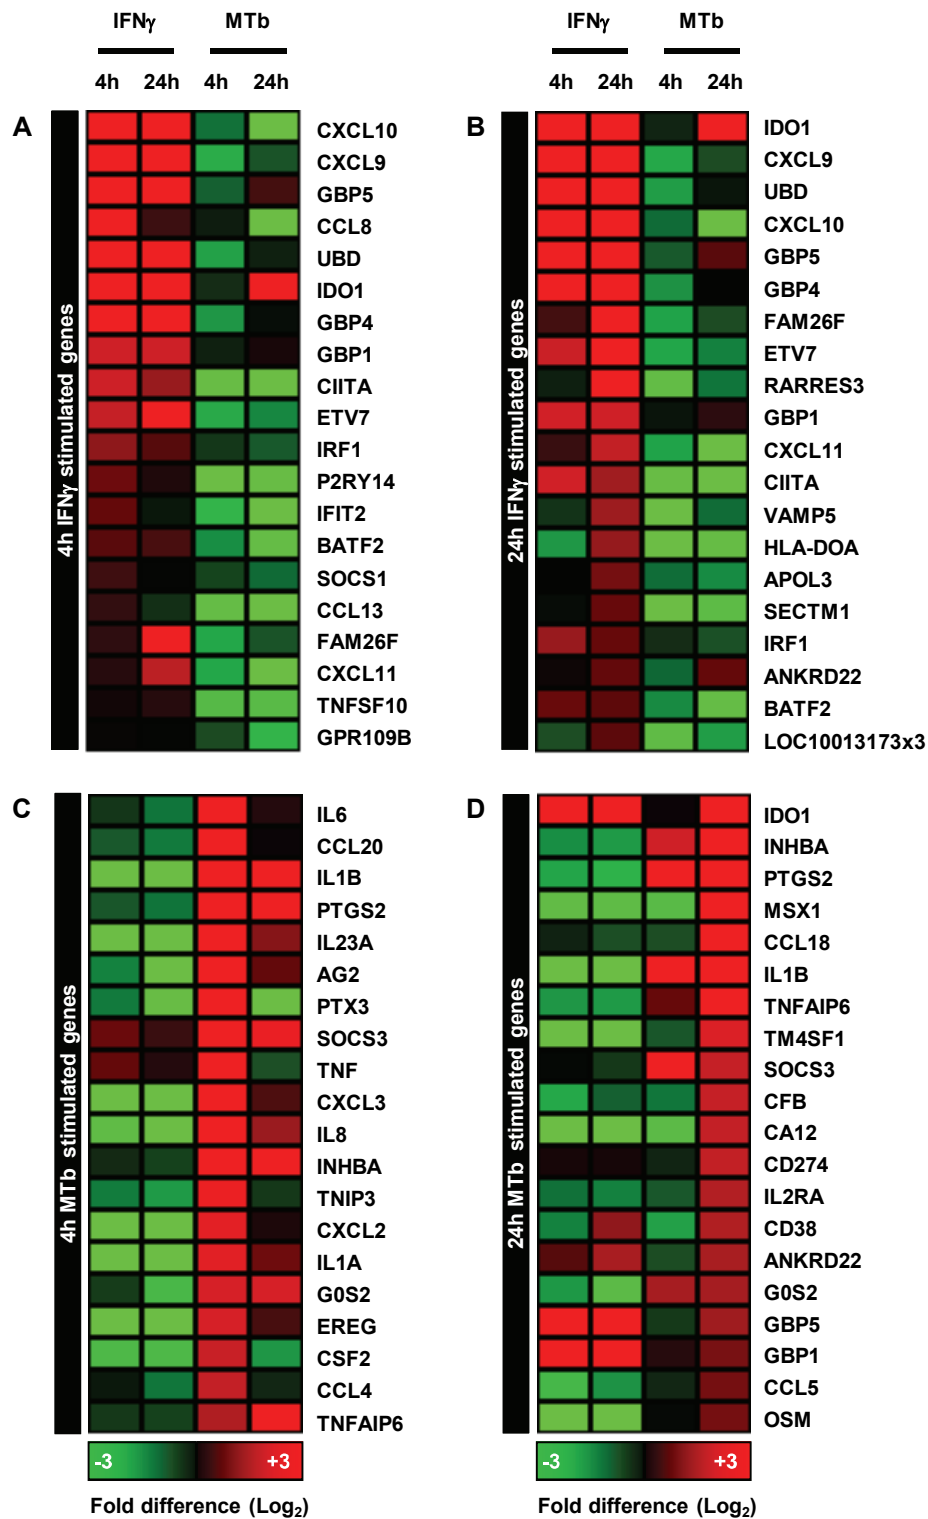

### Mtb & IFN $\gamma$ -stimulated genes in macrophages

Gene expression changes (mean fold difference to unstimulated macrophages from eight different donors) for data sets derived from Mtb and IFN $\gamma$  stimulated macrophages from three donors are compared for each of the top 20 gene expression changes induced by 4-24h Mtb or IFN $\gamma$  stimulation. These data show that innate immune responses to Mtb and IFN $\gamma$  stimulated changes show limited overlap.

**SUPPLEMENTARY TABLE 1: STUDY SUBJECTS DEMOGRAPHIC DATA**

| Study ID | Gender | Age | Ethnicity | BCG | Previous TB | TST (mm) | Histological Inflammation | QuantiferON | T-SPOT.TB | PPD ELISpot |
|----------|--------|-----|-----------|-----|-------------|----------|---------------------------|-------------|-----------|-------------|
| V1*      | F      | 26  | White     | *   | *           | 11       | ✓                         | Negative    | Negative  | Negative    |
| V2*      | M      | 22  | White     | ✓   | *           | 11       | ✓                         | Negative    | Negative  | N/A         |
| V3       | M      | 22  | White     | *   | *           | 0        | *                         | Negative    | Negative  | N/A         |
| V4       | F      | 33  | White     | ✓   | *           | 0        | *                         | Negative    | Negative  | Negative    |
| V5       | F      | 38  | Black     | *   | *           | 10       | ✓                         | Negative    | Negative  | N/A         |
| V6       | F      | 40  | White     | *   | *           | 0        | *                         | Negative    | Negative  | Positive    |
| V7*      | M      | 22  | Mixed     | *   | *           | 0        | *                         | Negative    | Negative  | Positive    |
| V8*      | M      | 32  | White     | *   | *           | 0        | *                         | Negative    | Negative  | Positive    |
| CT1*     | F      | 49  | White     | N/A | *           | 24       | ✓                         | N/A         | Negative  | N/A         |
| CT2*     | M      | 37  | Black     | N/A | *           | 21       | ✓                         | N/A         | Positive  | N/A         |
| CT3      | F      | 35  | Black     | N/A | ✓           | 35       | ✓                         | N/A         | Negative  | N/A         |
| CT4*     | F      | 44  | Mixed     | N/A | *           | 0        | *                         | N/A         | Negative  | N/A         |
| CT5      | M      | 43  | White     | N/A | *           | 0        | ✓                         | N/A         | Negative  | N/A         |
| CT6      | M      | 41  | Black     | N/A | *           | 35       | ✓                         | N/A         | Negative  | N/A         |
| CT7      | F      | 51  | Mixed     | N/A | *           | 25       | ✓                         | N/A         | Negative  | N/A         |
| CT8      | F      | 39  | Mixed     | N/A | *           | 24       | ✓                         | N/A         | Positive  | N/A         |
| CT9*     | F      | 36  | Mixed     | N/A | *           | 0        | *                         | N/A         | Negative  | N/A         |
| CT10     | F      | 31  | White     | N/A | *           | 0        | *                         | N/A         | Negative  | N/A         |
| CT11     | F      | 39  | Mixed     | N/A | *           | 0        | *                         | N/A         | Negative  | N/A         |
| CT12     | F      | 44  | Mixed     | N/A | *           | 52       | ✓                         | N/A         | Positive  | N/A         |

\*Samples analysed by microarrays obtained from these subjects
